# Supplementary material for: Cytocompatibility, Antimicrobial and Antioxidant Activity of a Mucoadhesive Biopolymeric Hydrogel Embedding Selenium Nanoparticles Phytosynthesized by Sea Buckthorn Leaf Extract
Source: MDPI journal article supplement (doi:10.3390/ph17010023), 2023-12-22
Supplement: s1 [file s1]

# Cytocompatibility, Antimicrobial and Antioxidant Activity of a Mucoadhesive Biopolymeric Hydrogel Embedding Selenium Nanoparticles Phyto-Synthesized by Sea Buckthorn Leaf Extract

Naomi Tritean, Luminița Dimitriu, Ștefan-Ovidiu Dima, Rusândica Stoica, Bogdan Trică, Marius Ghiurea, Ionuț Moraru, Anisoara Cimpean, Florin Oancea and Diana Constantinescu-Aruxandei

## Supplementary Information

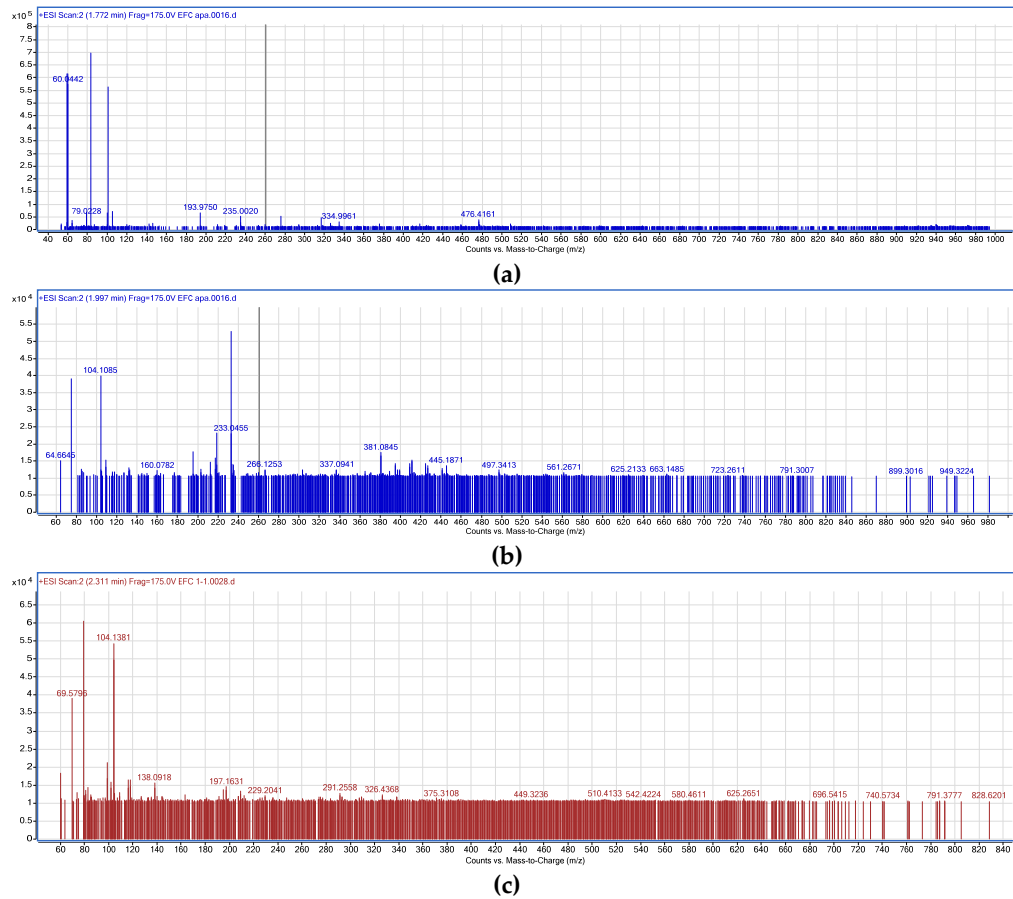

Figure S1. LC-TOF/MS chromatograms of SbLEx: (a)-(c)  $[M+H]^+$  (m/z).

Table S1. HPLC-DAD linearity results

| Compound               | $\lambda$ (nm) | Regression equation   | Correlation coefficient |
|------------------------|----------------|-----------------------|-------------------------|
| catechin               | 280            | $y = 6.482x + 1.894$  | 0.9999                  |
| epicatechin            | 280            | $y = 8.102x + 0.904$  | 0.9998                  |
| quercetin 3-rutinoside | 350            | $y = 14.302x - 0.035$ | 0.9999                  |

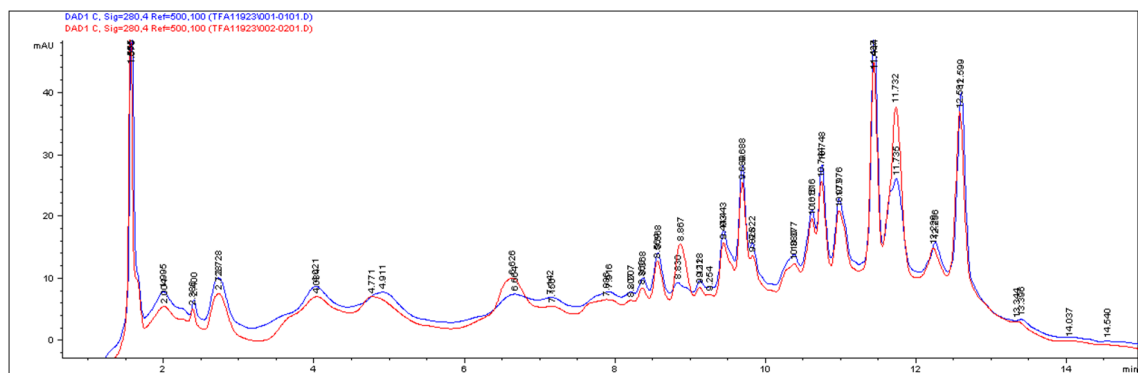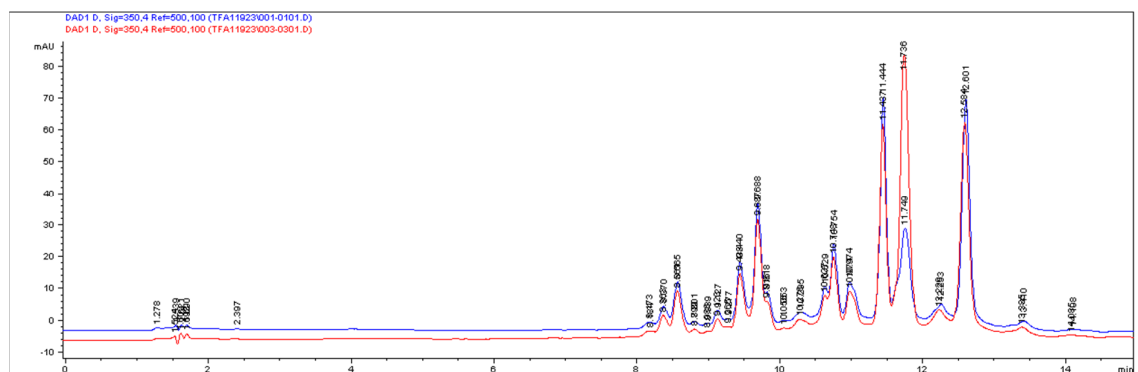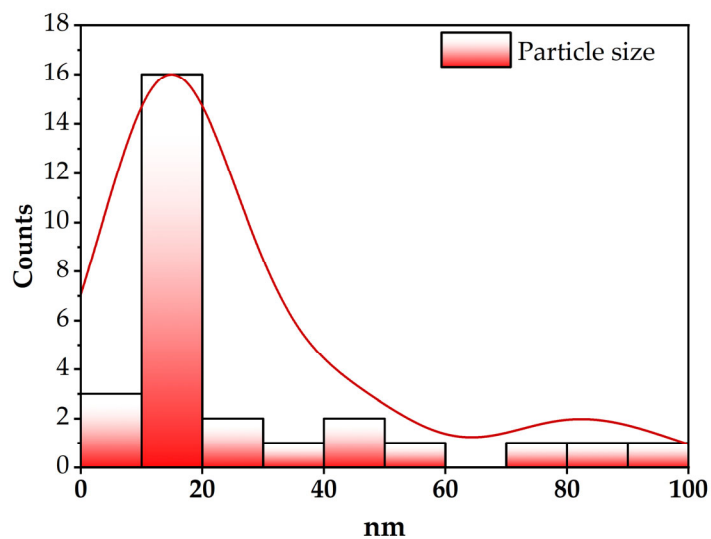

**Table S2.** EDX analysis of SeNPsSb

| Element | Weight % | Atomic % | Uncert. % |
|---------|----------|----------|-----------|
| C(K)    | 86.31%   | 92.89%   | 0.24      |
| O(K)    | 7.22%    | 5.84%    | 0.15      |
| Cu(K)   | 5.44%    | 1.10%    | 0.05      |
| Se(K)   | 1.03%    | 0.17%    | 0.02      |
| Total   | 100.00%  | 100.00%  |           |

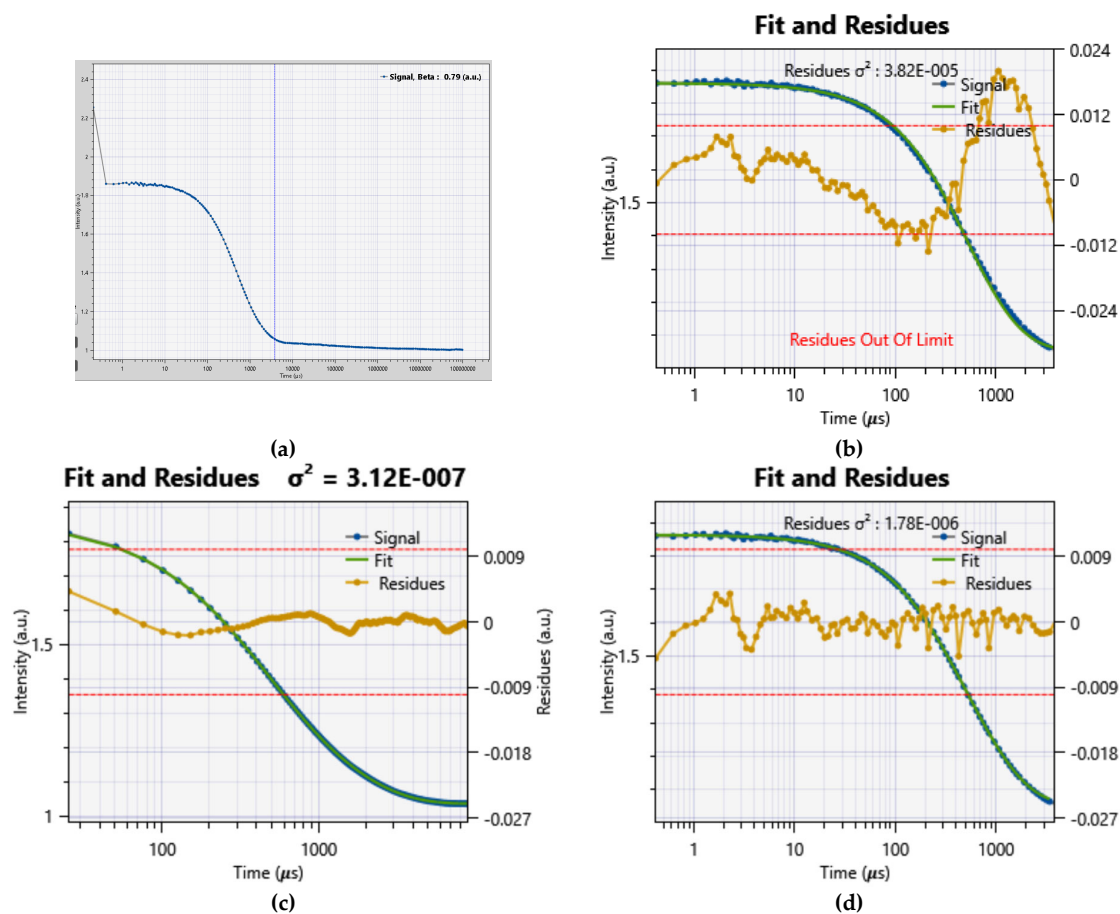

**Figure S5.** DLS analysis: (a) autocorrelation function for SeNPsSb; (b) simulation of autocorrelation function for Cumulants method; (c) simulation of autocorrelation function for Pade Laplace (PL) method; (d) simulation of autocorrelation function for SBL method.

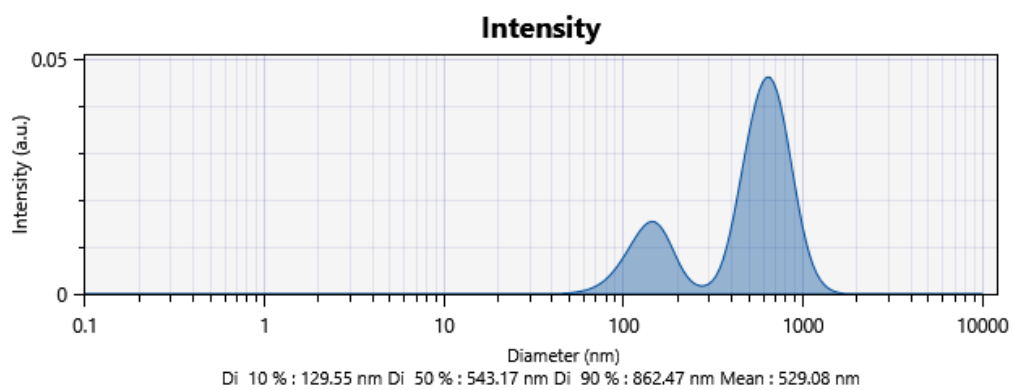

(a)

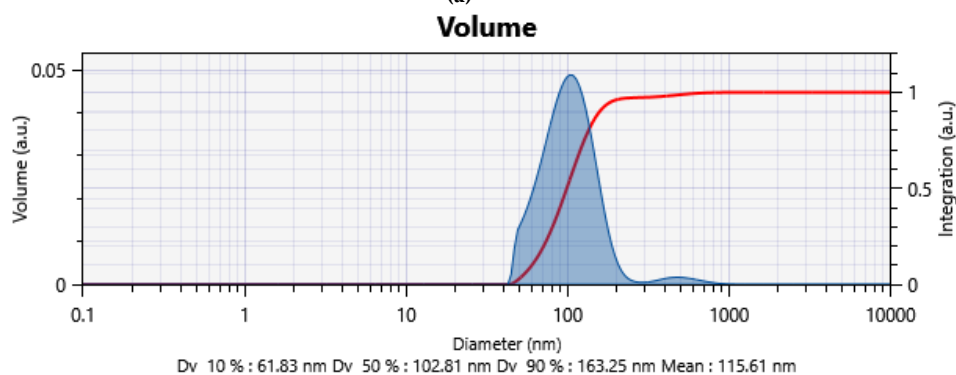

(b)

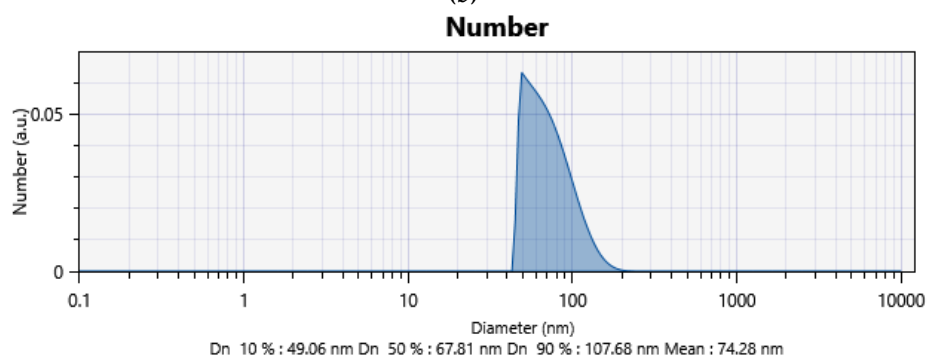

(c)

**Figure S6.** DLS analysis of SeNPsSb: (a) Intensity; (b) Volume; (c) Number.

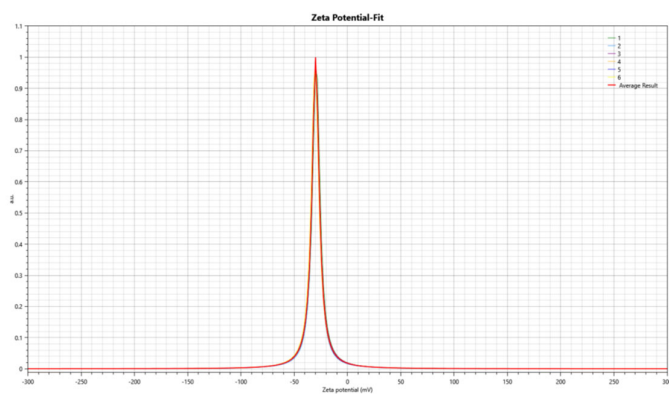

**Figure S7.** Zeta potential analysis of SeNPsSb.

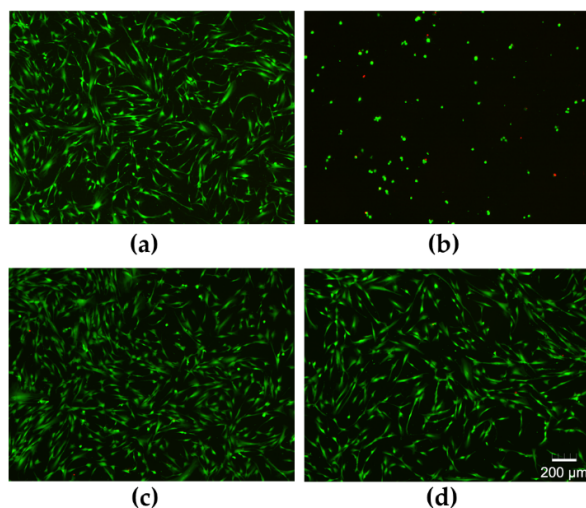

**Figure S8.** Cytocompatibility of SeNPsSb: (a)–(d) LIVE/DEAD assay (green fluorescence indicates live cells, red fluorescence indicates dead cells): (a) untreated cells; (C–, negative cytotoxicity control); (b) cells treated with 7.5% DMSO (C+, positive cytotoxicity control); (c) cells treated with 0.5 µg/mL SeNPsSb; (d) cells treated with 2.5 µg/mL SeNPsSb.

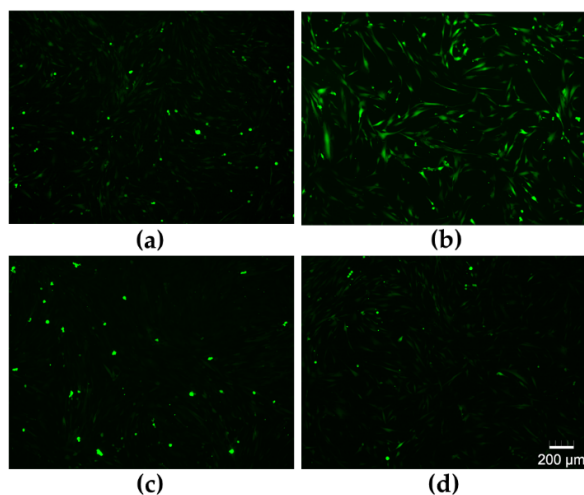

**Figure S9.** In vitro antioxidant activity of SeNPsSb: (a)–(d) Fluorescence microscopy images after labeling the total intracellular ROS with H<sub>2</sub>DCFDA (green fluorescence): (a) untreated cells (C–, negative control); (b) cells treated with 37 µM H<sub>2</sub>O<sub>2</sub> (C+, positive control; ROS inducer); (d-e) HGF-1 cells incubated in the presence of ROS inducer and (c) 0.5 µg/mL SeNPsSb; (d) 2.5 µg/mL SeNPsSb.

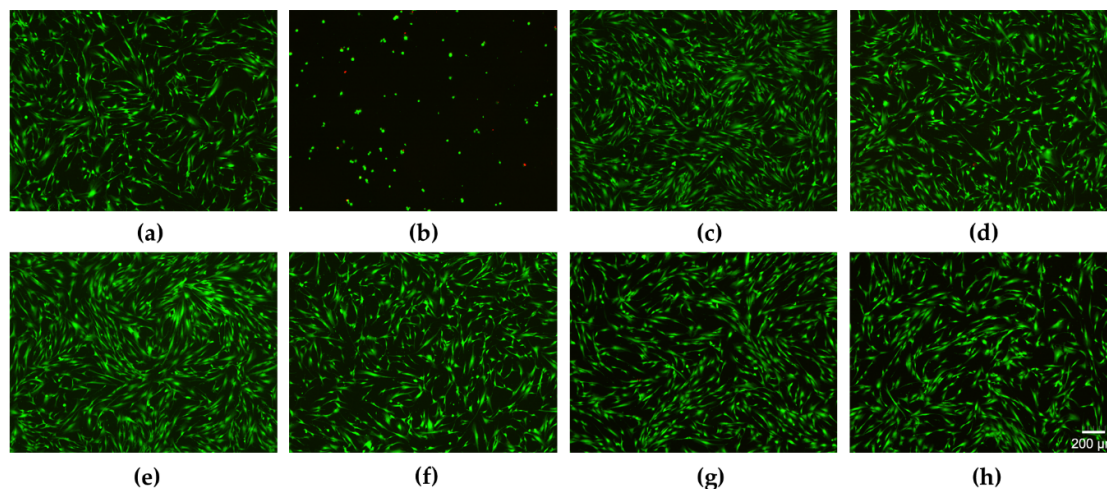

**Figure S10.** Cytocompatibility of Se-HNF: (a)–(h) LIVE/DEAD assay (green fluorescence indicates live cells, red fluorescence indicates dead cells): (a) untreated cells; (C–; negative cytotoxicity control); (b) cells treated with 7.5% DMSO (C+; positive cytotoxicity control); (c) 25 µg/mL HNF; (d) 1000 µg/mL HNF; (e) 25 µg/mL 0.5 Se-HNF; (f) 1000 µg/mL 0.5 Se-HNF; (g) 25 µg/mL 0.5 Se-HNF; (h) 1000 µg/mL 0.5 Se-HNF.

1000 µg/mL 0.5 Se-HNF; (g) 25 µg/mL 2.5 Se-HNF; (h) 1000 µg/mL 2.5 Se-HNF; HNF – 5% water-soluble chitosan in 0.4% never-dried bacterial nanocellulose; 0.5 Se-HNF – HNF with 0.5 µg/mL SeNPsSb; 2.5 Se-HNF – HNF with 2.5 µg/mL SeNPsSb.

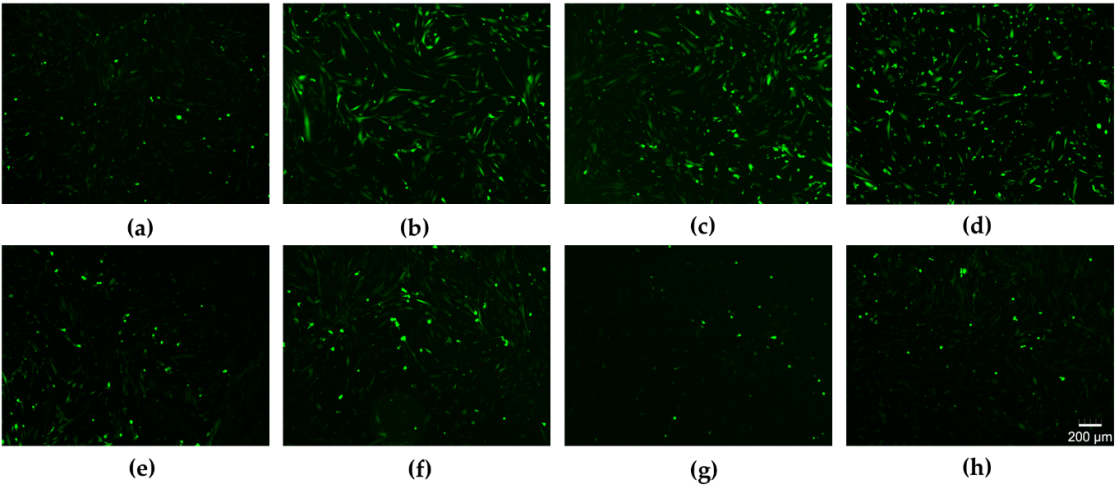

**Figure S11.** In vitro antioxidant activity of hydrogel formulations: (a)–(h) Fluorescence microscopy images after labeling the total intracellular ROS with H<sub>2</sub>DCFDA (green fluorescence): (a) untreated cells (C–; negative control); (b) cells treated with 37 µM H<sub>2</sub>O<sub>2</sub> (C+; positive control; ROS inducer); (e-i) HGF-1 cells incubated in the presence of ROS inducer and (c) 25 µg/mL HNF; (d) 1000 µg/mL HNF; (e) 25 µg/mL 0.5 Se-HNF; (f) 1000 µg/mL 0.5 Se-HNF; (g) 25 µg/mL 2.5 Se-HNF; (h) 1000 µg/mL 2.5 Se-HNF; HNF – 5% water-soluble chitosan in 0.4% never-dried bacterial nanocellulose; 0.5 Se-HNF – HNF with 0.5 µg/mL SeNPsSb; 2.5 Se-HNF – HNF with 2.5 µg/mL SeNPsSb.

**Table S3.** The inhibition zone 24 h after SeNPsSb treatment.

| SeNPsSb (mg/mL) | <i>B. cereus</i> | <i>E. faecalis</i> | <i>S. aureus</i> | <i>C. albicans</i> |
|-----------------|------------------|--------------------|------------------|--------------------|
| 0.05            |                  |                    |                  |                    |
| 0.1             |                  |                    |                  |                    |
| 0.2             |                  |                    |                  |                    |
| 0.5             |                  |                    |                  |                    |
| 1               |                  |                    |                  |                    |
| 2               |                  |                    |                  |                    |

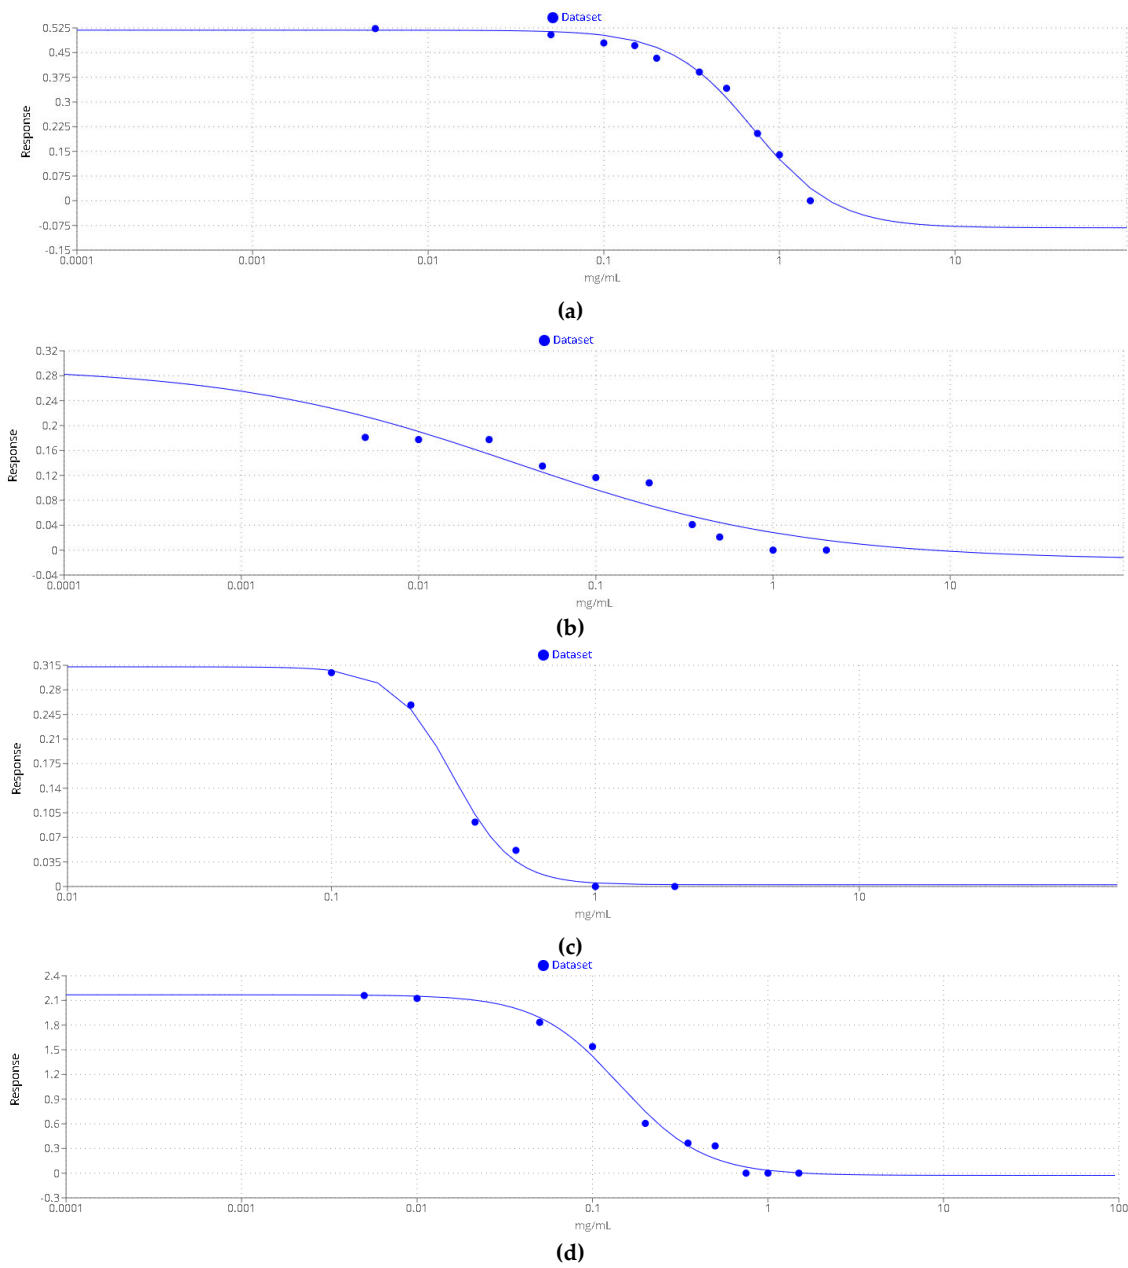

**Figure S12.** IC50 plot: (a) *B. cereus*; (b) *E. faecalis*; (c) *S. aureus*; (d) *C. albicans*.
